# Supplementary material
Source: Springer Nature journal article supplement (https://www.springermedizin.de/resource/supplementary/12889_2012_5211_MOESM1_ESM.pdf/9495016)

**A**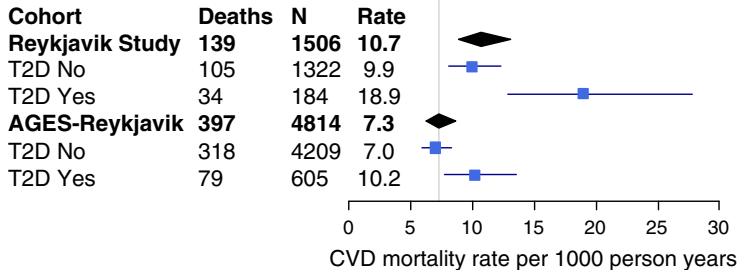**B**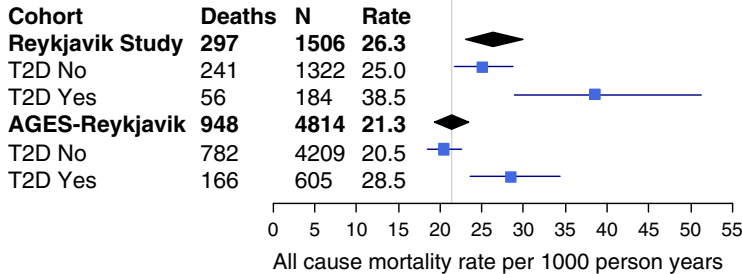

Supplement: MOESM1 [file 9495016]
